# Supplementary material for: Association of Septal Myectomy With Quality of Life in Patients With Left Ventricular Outflow Tract Obstruction From Hypertrophic Cardiomyopathy
Source: PubMed Central journal article supplement (PMC9011128; doi:10.1001/jamanetworkopen.2022.7293), 2022-04-14
Supplement: jamanetwopen-e227293-s001.pdf [file jamanetwopen-e227293-s001.pdf]

1 **Functional capacity and quality of life following septal**  
2 **myectomy in patients with obstructive hypertrophic**  
3 **cardiomyopathy**

4  
5  
6  
7  
8 **Principal Investigator:**  
9 **Milind Desai, MD**

10  
11  
12 **Amendment 1 version: October 10, 2017**  
13 **Original Version: January 25, 2017**  
14  
15  
16  
17

---

18

## SIGNATURE PAGE

19 The signature below constitutes the approval of this protocol and the attachments, and provides  
20 the necessary assurances that this trial will be conducted according to all stipulations of the  
21 protocol, including all statements regarding confidentiality, and according to local legal and  
22 regulatory requirements and applicable US federal regulations and ICH guidelines.

23

24

25

26

27

28

Principal Investigator

Signed: \_\_\_\_\_ Date: \_\_\_\_\_

*Name*

*Title*

29

## Table of Contents

|    |                                                             | <u>page</u> |
|----|-------------------------------------------------------------|-------------|
| 30 | Signature Page.....                                         | i           |
| 31 | List of Abbreviations.....                                  | iii         |
| 32 | Protocol Summary .....                                      | iv          |
| 33 |                                                             |             |
| 34 | 1 Key Roles.....                                            | 5           |
| 35 | 2 Background Information and Scientific Rationale .....     | 6           |
| 36 | 2.1 Background Information .....                            | 6           |
| 37 | 2.2 Rationale .....                                         | 7           |
| 38 | 2.3 Potential Risks and Benefits.....                       | 7           |
| 39 | 2.3.1 Potential Risks .....                                 | 7           |
| 40 | 2.3.2 Known Potential Benefits.....                         | 7           |
| 41 | 3 Objectives .....                                          | 8           |
| 42 | 4 Study Design.....                                         | 9           |
| 43 | 4.1 Selection of the Study Population .....                 | 9           |
| 44 | 4.2 Inclusion/Exclusion Criteria .....                      | 9           |
| 45 | 5 Study Procedures/Evaluations .....                        | 10          |
| 46 | 5.1 Study Procedures.....                                   | 10          |
| 47 | 5.2 Subject Compensation .....                              | 10          |
| 48 | 6 Study Schedule .....                                      | 11          |
| 49 | 6.1 Screening .....                                         | 11          |
| 50 | 6.2 Baseline visit .....                                    | 11          |
| 51 | 6.3 Follow-up Visit.....                                    | 11          |
| 52 | 7 Assessment of Outcome Measures .....                      | 12          |
| 53 | 7.1 Specification of the Appropriate Outcome Measures ..... | 12          |
| 54 | 7.1.1 Primary Outcome Measures.....                         | 12          |
| 55 | 7.1.2 Secondary Outcome Measures .....                      | 12          |
| 56 | 8 Statistical Considerations.....                           | 13          |
| 57 | 8.1 Study Outcome Measures.....                             | 13          |
| 58 | 8.2 Sample Size Considerations .....                        | 13          |
| 59 | 8.3 Participant Enrollment and Follow-Up .....              | 13          |
| 60 | 8.4 Analysis Plan.....                                      | 13          |
| 61 | 9 Data Handling and Record Keeping.....                     | 15          |
| 62 | 9.1 Data Capture Methods .....                              | 15          |
| 63 | 9.2 Types of Data .....                                     | 15          |
| 64 |                                                             |             |
| 65 | Literature.....                                             | 17          |

---

## List of Abbreviations

|                 |                                                          |
|-----------------|----------------------------------------------------------|
| DASI            | Duke Activity Status Index                               |
| ECG             | Electrocardiogram                                        |
| EF              | Ejection Fraction                                        |
| HCM             | Hypertrophic Cardiomyopathy                              |
| HF              | Heart Failure                                            |
| ICD             | Implantable Cardioverter-Defibrillator                   |
| ICF             | Informed Consent Form                                    |
| KCCQ            | Kansas City Cardiomyopathy Questionnaire                 |
| LV              | Left Ventricle                                           |
| LVAD            | Left Ventricular Assist Device                           |
| LVH             | Left Ventricular Hypertrophy                             |
| LVOT            | Left Ventricular Outflow Tract                           |
| METS            | Metabolic Equivalent                                     |
| NSVT            | Nonsustained Ventricular Tachycardia                     |
| NYHA            | New York Heart Association                               |
| PI              | Principal Investigator                                   |
| PROMIS          | Patient-Reported Outcomes Measurement Information System |
| SAM             | Systolic Anterior Motion                                 |
| SCD             | Sudden Cardiac Death                                     |
| VO <sub>2</sub> | Oxygen Uptake                                            |
| VT              | Ventricular Tachycardia                                  |
| VF              | Ventricular Fibrillation                                 |

66

67

68

## Protocol Summary

69  
70 **Title:** Functional capacity and quality of life following septal myectomy in  
71 patients with obstructive hypertrophic cardiomyopathy  
72  
73 **Population:** 175 patients, male and female, age 18-65, diagnosed with hypertrophic  
74 cardiomyopathy  
75  
76 **Number of Sites:** 1  
77  
78 **Study Duration:** 3 years  
79  
80 **Subject Duration:** One visit prior to septal myectomy and one follow-up visit approximately  
81 12±6 months following surgery per subject.  
82  
83 **Objectives:** The primary aim of this study is to examine change in quality of life as  
84 measured by the KCCQ following septal myectomy in patients with  
85 obstructive hypertrophic cardiomyopathy as compared to prior to surgery.  
86 Secondary aims include the assessing change in functional capacity  
87 utilizing six-minute walk test distance, and quality of life as measured by  
88 the PROMIS and DASI following septal myectomy in patients with  
89 obstructive hypertrophic cardiomyopathy as compared to prior to surgery.  
90 The aim of the substudy is to examine change in exercise capacity by  
91 cardiometabolic exercise testing in a subset of patients who underwent  
92 cardiometabolic exercise testing prior to septal myectomy as part of their  
93 routine clinical care.  
94

95 **1 KEY ROLES**

96 **Individuals:**

97 **Principal Investigator** Milind Desai, MD

98 **Additional Investigators** Albree Tower-Rader, MD

99 Harry Lever, MD

100 Nicholas Smedira, MD

101 Maran Thamilarsan, MD

102 Zoran Popovic, MD

103

104

105 **Recruiting Site:** Cleveland Clinic Main Campus

106

## 107 **2 BACKGROUND INFORMATION AND SCIENTIFIC** 108 **RATIONALE**

### 109 **2.1 Background Information**

110 Hypertrophic cardiomyopathy is a common inherited cardiac condition with an incidence  
111 estimated to be approximately 1 in 500 and variable phenotypes (1). Symptoms of palpitations,  
112 chest pain, shortness of breath, heart failure and pre-syncope or syncope have been attributed  
113 to multiple aspects of the disease including left ventricular outflow tract (LVOT) obstruction,  
114 mitral regurgitation, diastolic dysfunction and atrial fibrillation. Approximately 70% of patients  
115 with HCM have either resting or provokable LVOT obstruction (2-4). Treatment for patients who  
116 are refractory to medical therapy has focused on the relief of LVOT obstruction either by septal  
117 myectomy or alcohol septal ablation (5-10).

118 Several reports of outcomes following septal myectomy have demonstrated  
119 improvements in symptoms. Additionally in one cohort, patients were shown to have similar  
120 mortality to the general population matched for age and gender (11). However, studies  
121 examining improvement following surgery have been limited to description of mortality rates and  
122 change in LVOT gradients and severity of mitral regurgitation. Symptoms have been  
123 qualitatively studied either as patients reporting yes/no to the presence of specific symptoms, or  
124 physician assessment of functional capacity as measured by New York Heart Association  
125 (NYHA) functional class (7,10,12-17). More recent studies evaluating the efficacy of alternative  
126 treatments like ventricular pacing have demonstrated qualitative improvements in symptoms  
127 (NYHA functional class, Minnesota Living with Heart Failure Questionnaire scores) as well as  
128 quantitatively with walk distances on six minute walk tests and peak oxygen uptake (VO<sub>2</sub>) by  
129 cardiometabolic exercise testing (18,19). One small study compared walk distance and peak  
130 oxygen uptake (VO<sub>2</sub>) in 20 patients with obstructive HCM who underwent septal myectomy and  
131 19 patients who underwent pacemaker implantation and found improvement in the septal  
132 myectomy group, though this was a small study (20).

133 Quality of Life assessment tools have gained traction in their use more recently as an  
134 additional outcome metric. KCCQ is a disease-specific quality of life questionnaire which was  
135 designed and validated in the heart failure population (21-23), though it has been validated for  
136 use in patients with aortic stenosis (24). There is one study of a cohort of patients with HCM and  
137 been shown to correlate with peak oxygen uptake and inversely correlate with NYHA functional  
138 class at a cross-section in time (25). Though the Patient-Reported Outcomes Measurement  
139 Information System (PROMIS) has not been studied in a population with hypertrophic  
140 cardiomyopathy specifically, it was designed as a general health-related quality of life  
141 assessment tool and tested in a large patient cohort including patients with cardiac conditions,  
142 and shown to correlate well with other general health-related quality of life assessment tools like  
143 the EuroQol five dimensions (EQ-5D) questionnaire (26,27). Additionally the Duke Activity  
144 Status Index has been shown to correlate well with functional capacity and yield prognostic

145 value in patients with heart failure (28-30). Based on their prior use in patients with heart failure  
146 we chose to use these health-related quality of life metrics since patients who are symptomatic  
147 from LVOT obstruction in HCM often have symptoms found in heart failure such as functional  
148 limitation, dyspnea on exertion and heart failure.

## 149 **2.2 Rationale**

150 Currently septal myectomy is the preferred treatment for patients with LVOT obstruction  
151 and symptoms despite medical therapy though there have been few large studies evaluating  
152 quantitative improvements in functional capacity and quality of life following septal myectomy.  
153 This prospective cohort will address what quantitative improvements in functional capacity and  
154 quality of life may be seen following septal myectomy, and more importantly may serve to  
155 identify a cohort of patients whom do not benefit from surgery.  
156

## 157 **2.3 Potential Risks and Benefits**

### 158 **2.3.1 Potential Risks**

159

#### 160 **Six-minute Walk Test**

161 The risk of a six minute walk test are equivalent to those of normal walking.

162

#### 163 **Quality of Life Surveys**

164 Questions composing these surveys may at times make patients feel embarrassed.

165

#### 166 **Cardiometabolic Stress Testing**

167 During cardiometabolic stress testing patients breathe through a tube designed to quantify  
168 oxygen and carbon dioxide exchange. This portion of the test may make patients feel  
169 uncomfortable or claustrophobic. Additionally the process of exercising to peak exercise stress  
170 may make patients symptomatic or cause them distress.

171

### 172 **2.3.2 Known Potential Benefits**

173 There are no specific benefits to the patient.



174 **3 OBJECTIVES**

175 The primary aim of this study is to examine change in quality of life as measured by the  
176 KCCQ following septal myectomy in patients with obstructive hypertrophic cardiomyopathy as  
177 compared to prior to surgery. Secondary aims include the assessing change in functional  
178 capacity utilizing six-minute walk test distance, and quality of life as measured by the PROMIS  
179 and DASI following septal myectomy in patients with obstructive hypertrophic cardiomyopathy  
180 as compared to prior to surgery. The aim of the substudy is to examine change in exercise  
181 capacity by cardiometabolic exercise testing in a subset of patients who underwent  
182 cardiometabolic exercise testing prior to septal myectomy as part of their routine clinical care.

183 The study will be powered to detect a mild change in Kansas City Cardiomyopathy  
184 Questionnaire summary score since this disease-specific health-related quality of life  
185 assessment tool has been well studied and changes in clinical status have been validated within  
186 a heart failure population. A substudy will also be powered to detect an absolute increase in  
187 peak oxygen uptake on cardiometabolic exercise testing. Additional secondary end-points will  
188 include change in score on the Patient-Reported Outcomes Measurement Information System  
189 (PROMIS) global health questionnaire and Duke Activity Status Index (DASI), distance walked  
190 on six-minute walk test, and rate of atrial fibrillation, stroke, hospitalization for heart failure,  
191 repeat septal myectomy, left ventricular assist device or heart transplant, aborted sudden death  
192 including appropriate internal cardioverter defibrillator, or death by follow up visit.

193  
194

195 **4 STUDY DESIGN**

196 **4.1 Selection of the Study Population**

197

198 Patient characteristics:

199 175 patients will be recruited

200

201 Recruiting locations:

202 Outpatient setting from Cleveland Clinic Main Campus

203

204 Eligibility criteria:

205 Patients aged 18-65 with an established diagnosis of obstructive HCM defined as LVH  
206 defined as any segment  $\geq 15$ mm thick, without a predisposing cause, and left ventricular outflow  
207 tract gradient  $\geq 50$ mmHg at rest or with provocation scheduled to undergo septal myectomy  
208 within 90 days following the baseline encounter.

209 Patients are eligible to take part in the substudy if they have a **Cardiometabolic**  
210 **Stress Testing** done within 6 months of their scheduled surgery.

211 **4.2 Inclusion/Exclusion Criteria**

212

213 Inclusion criteria:

- 214 • Patients aged 18-65 with an established diagnosis of obstructive HCM defined as  
215 LVH defined as any segment  $\geq 15$ mm thick, without a predisposing cause, and left  
216 ventricular outflow tract gradient  $\geq 50$ mmHg at rest or with provocation scheduled to  
217 undergo septal myectomy within 90 days following the baseline encounter.
- 218 • A subset of patients who underwent cardiometabolic exercise testing as part of their  
219 testing within 6 months prior to their scheduled septal myectomy, will be eligible for a  
220 substudy examining improvements in performance on cardiometabolic exercise  
221 testing following septal myectomy

222

223 Exclusion criteria:

- 224 1) Prior septal myectomy or alcohol septal ablation
- 225 2) Prior myocardial infarction
- 226 3) Uncontrolled arrhythmias including ventricular tachycardia and atrial fibrillation
- 227 4) Uncontrolled hypertension
- 228 5) Angiographically documented coronary stenosis  $>50\%$ , if available at time of screening
- 229 6) Inability to provide informed consent
- 230 7) Inability to walk without assistive devices
- 231 8) Peripheral artery disease with claudication

## 232 **5 STUDY PROCEDURES/EVALUATIONS**

### 233 **5.1 Study Procedures**

#### 234 • **Intake history, physical, and recording of prior test results**

235 Per routine clinical care at baseline and follow up visits:

- 236 • A medical history will be obtained including a complete family history
- 237 • A limited physical examination will be performed including heart rate and blood pressure
- 238 • Results of testing prior to septal myectomy available at the baseline visit will be recorded
- 239 including ECG, exercise testing, Holter monitoring, and echocardiography.
- 240 • ECG and echocardiography per standard of care at follow up visits

241

#### 242 • **Study-specific Testing**

243 Six-minute walk test at baseline and follow-up visit

244 Quality of Life Assessments (KCCQ, PROMIS, and DASl) at baseline and follow-up visit

245 Cardiometabolic exercise testing at follow up in the substudy patients who had undergone  
246 cardiometabolic exercise testing prior to septal myectomy as part of their routine care

247

### 248 **5.2 Subject Compensation**

249 Compensation for parking for required visits for the study protocol will be compensated.  
250 Patients enrolled in the substudy may also receive compensation for a meal on the day  
251 of the cardiometabolic stress test. Testing performed outside of the scope of normal  
252 clinical practice including 6-minute walk test and quality of life assessments (KCCQ,  
253 PROMIS and DASl) at baseline and follow up visit, and cardiometabolic exercise testing  
254 at follow up visit in the substudy will be covered in full by the study.

255 **6 STUDY SCHEDULE**

256 **6.1 Screening**

257 Informed consent must be obtained by a member of the study team prior to any study-related  
258 procedures. Patient's medical records will be reviewed to be certain of diagnosis and eligibility.  
259 Patients will be identified for eligibility for the substudy evaluating change in performance on  
260 cardiometabolic exercise testing simultaneously.  
261

262 **6.2 Baseline visit**

263  
264 Initial encounter for the research protocol will involve a six-minute walk test and quality of life  
265 assessments prior to septal myectomy. Clinical data regarding the baseline visit (history,  
266 physical exam, echocardiogram, cardiometabolic stress test, etc) will be obtained by the  
267 individual physician per standard of care.

268 **6.3 Follow-up Visit**

269 Follow up visit will be scheduled at a mean of  $12\pm 6$  months post-septal myectomy for a six-  
270 minute walk test and quality of life assessments will be administered for a second time. For the  
271 subset of patients who underwent cardiometabolic exercise testing prior to septal myectomy  
272 who are enrolled in the substudy, they will undergo repeat cardiometabolic exercise testing  
273 again at this point. Post-operative clinical follow up data will be obtained from the outpatient visit  
274 per standard of care, and data collection regarding outcomes (atrial fibrillation, stroke, ICD  
275 discharge etc.) will terminate at the time of the follow up visit.

## 276 **7 ASSESSMENT OF OUTCOME MEASURES**

### 277 **7.1 Specification of the Appropriate Outcome Measures**

#### 278 **7.1.1 Primary Outcome Measures**

279 Primary outcome measure is improvement in:

- 280 • Kansas City Cardiomyopathy Questionnaire (KCCQ) summary score

281

#### 282 **7.1.2 Secondary Outcome Measures**

283 Secondary outcome measures will include:

- 284 • Kansas City Cardiomyopathy Questionnaire (KCCQ) summary score
- 285 • Patient-Reported Outcomes Measurement Information System (PROMIS) global health  
286 score
- 287 • Duke Activity Status Index (DASI) score
- 288 • Distance walked with 6-minute walk test
- 289 • Peak oxygen uptake on cardiometabolic exercise testing
- 290 • Death
- 291 • Aborted sudden cardiac death including appropriate internal cardioverter defibrillator  
292 discharge
- 293 • Need for left ventricular assist device or heart transplantation
- 294 • Need for repeat septal myectomy
- 295 • Atrial fibrillation
- 296 • Stroke
- 297 • Hospitalization for heart failure
- 298 • Cardiac Rehabilitation post-surgery

## 299 **8 STATISTICAL CONSIDERATIONS**

### 300 **8.1 Study Outcome Measures**

301

302 The primary endpoint of this prospective study is a mild improvement in Kansas City  
303 Cardiomyopathy summary score (increase in 5).

304 Secondary endpoints include improvement in Kansas City Cardiomyopathy Questionnaire  
305 (KCCQ) summary score, Patient-Reported Outcomes Measurement Information System  
306 (PROMIS) global health score, Duke Activity Status Index (DASI) score, Distance walked with 6-  
307 minute walk test, all-cause mortality, ventricular tachyarrhythmias, left ventricular assist device  
308 placement, heart transplantation, repeat septal myectomy, hospitalization for heart failure, atrial  
309 fibrillation, and stroke.

310 These will be assessed at patient follow up visit.

### 311 **8.2 Sample Size Considerations**

312 Assuming an average KCCQ summary score of  $76 \pm 20$  in patients with hypertrophic  
313 cardiomyopathy based on previously published literature (25) and an alpha error rate of 5%, 133  
314 patients provides over 90% power to detect a mild change in KCCQ summary score defined as  
315 an absolute change of 5 points. An additional 42 patients (175 total) will be enrolled to  
316 compensate for a projected dropout rate of 10% per year over three years.

317 For the substudy, assuming an average maximal oxygen uptake (peak  $VO_2$ ) of  $19.4 \pm 6.4$   
318 ml/kg/min based on prior studies in patients with obstructive hypertrophic cardiomyopathy prior  
319 to septal myectomy (20) and an alpha error rate of 5%, 32 patients provides over 90% power to  
320 detect an absolute change of 2 ml/kg/min. An additional 3 patients (35 total) will be enrolled in  
321 the substudy to compensate for an absolute dropout rate of 10%.

### 322 **8.3 Participant Enrollment and Follow-Up**

323 175 patients will be followed through follow up visit at  $12 \pm 6$  months post-septal myectomy.

### 324 **8.4 Analysis Plan**

325 Overall statistical analysis should be straightforward and involve paired t-tests comparing the  
326 change in scores on quality of life assessments, and distance walked on six-minute walk tests.  
327 Additionally the incidence of other outcomes including atrial fibrillation, hospitalization for heart  
328 failure, repeat septal myectomy, sudden cardiac death or appropriate ICD discharge will be  
329 noted. For patients in the substudy, paired t-tests will also be used to compare peak oxygen

330 uptake prior to and following septal myectomy. Additional analyses examining the correlation of  
331 scores on various quality of life assessments to performance on exercise testing as measured  
332 by distance walked on six-minute walk test and peak oxygen uptake in the substudy patients  
333 may also yield valuable information regarding the performance of these assessments in the  
334 HCM population.  
335

## 336 **9 DATA HANDLING AND RECORD KEEPING**

### 337 **9.1 Data Capture Methods**

338 All clinical and intake data will be captured on electronic data collection forms (RedCap).

### 339 **9.2 Types of Data**

340 4 types of data will be collected:

- 341 • Clinical intake and follow-up data
- 342 • Six-minute walk test data
- 343 • Quality of Life Assessments (KCCQ, PROMIS and DASI) data
- 344 • Cardiometabolic exercise testing data (for substudy)

345



## Literature

346  
347  
348  
349  
350  
351  
352  
353  
354  
355  
356  
357  
358  
359  
360  
361  
362  
363  
364  
365  
366  
367  
368  
369  
370  
371  
372  
373  
374  
375  
376  
377  
378  
379  
380  
381  
382  
383  
384  
385  
386  
387  
388  
389  
390  
391  
392  
393

1. Maron BJ, Gardin JM, Flack JM, Gidding SS, Kurosaki TT, Bild DE. Prevalence of hypertrophic cardiomyopathy in a general population of young adults. Echocardiographic analysis of 4111 subjects in the CARDIA Study. Coronary Artery Risk Development in (Young) Adults. *Circulation* 1995;92:785-9.
2. Maron MS, Olivotto I, Betocchi S et al. Effect of left ventricular outflow tract obstruction on clinical outcome in hypertrophic cardiomyopathy. *N Engl J Med* 2003;348:295-303.
3. Maron MS, Olivotto I, Zenovich AG et al. Hypertrophic cardiomyopathy is predominantly a disease of left ventricular outflow tract obstruction. *Circulation* 2006;114:2232-9.
4. Elliott PM, Gimeno JR, Tome MT et al. Left ventricular outflow tract obstruction and sudden death risk in patients with hypertrophic cardiomyopathy. *Eur Heart J* 2006;27:1933-41.
5. Maron BJ. Hypertrophic cardiomyopathy: a systematic review. *Jama* 2002;287:1308-20.
6. Spirito P, Seidman CE, McKenna WJ, Maron BJ. The management of hypertrophic cardiomyopathy. *N Engl J Med* 1997;336:775-85.
7. McCully RB, Nishimura RA, Tajik AJ, Schaff HV, Danielson GK. Extent of clinical improvement after surgical treatment of hypertrophic obstructive cardiomyopathy. *Circulation* 1996;94:467-71.
8. Yu EH, Omran AS, Wigle ED, Williams WG, Siu SC, Rakowski H. Mitral regurgitation in hypertrophic obstructive cardiomyopathy: relationship to obstruction and relief with myectomy. *J Am Coll Cardiol* 2000;36:2219-25.
9. Sigwart U. Non-surgical myocardial reduction for hypertrophic obstructive cardiomyopathy. *Lancet* 1995;346:211-4.
10. Qin JX, Shiota T, Lever HM et al. Outcome of patients with hypertrophic obstructive cardiomyopathy after percutaneous transluminal septal myocardial ablation and septal myectomy surgery. *J Am Coll Cardiol* 2001;38:1994-2000.
11. Ommen SR, Maron BJ, Olivotto I et al. Long-term effects of surgical septal myectomy on survival in patients with obstructive hypertrophic cardiomyopathy. *J Am Coll Cardiol* 2005;46:470-6.
12. ten Berg JM, Suttorp MJ, Knaepen PJ, Ernst SM, Vermeulen FE, Jaarsma W. Hypertrophic obstructive cardiomyopathy. Initial results and long-term follow-up after Morrow septal myectomy. *Circulation* 1994;90:1781-5.
13. Cohn LH, Trehan H, Collins JJ, Jr. Long-term follow-up of patients undergoing myotomy/myectomy for obstructive hypertrophic cardiomyopathy. *Am J Cardiol* 1992;70:657-60.
14. Robbins RC, Stinson EB. Long-term results of left ventricular myotomy and myectomy for obstructive hypertrophic cardiomyopathy. *J Thorac Cardiovasc Surg* 1996;111:586-94.
15. Heric B, Lytle BW, Miller DP, Rosenkranz ER, Lever HM, Cosgrove DM. Surgical management of hypertrophic obstructive cardiomyopathy. Early and late results. *J Thorac Cardiovasc Surg* 1995;110:195-206; discussion 206-8.
16. Williams WG, Wigle ED, Rakowski H, Smallhorn J, LeBlanc J, Trusler GA. Results of surgery for hypertrophic obstructive cardiomyopathy. *Circulation* 1987;76:V104-8.
17. Maron BJ, Merrill WH, Freier PA, Kent KM, Epstein SE, Morrow AG. Long-term clinical course and symptomatic status of patients after operation for hypertrophic subaortic stenosis. *Circulation* 1978;57:1205-13.

- 394 18. Lenarczyk R, Wozniak A, Kowalski O et al. Effect of cardiac resynchronization on  
395 gradient reduction in patients with obstructive hypertrophic cardiomyopathy: preliminary  
396 study. *Pacing Clin Electrophysiol* 2011;34:1544-52.
- 397 19. Berruezo A, Vatasescu R, Mont L et al. Biventricular pacing in hypertrophic obstructive  
398 cardiomyopathy: a pilot study. *Heart Rhythm* 2011;8:221-7.
- 399 20. Ommen SR, Nishimura RA, Squires RW, Schaff HV, Danielson GK, Tajik AJ.  
400 Comparison of dual-chamber pacing versus septal myectomy for the treatment of  
401 patients with hypertrophic obstructive cardiomyopathy: a comparison of objective  
402 hemodynamic and exercise end points. *J Am Coll Cardiol* 1999;34:191-6.
- 403 21. Green CP, Porter CB, Bresnahan DR, Spertus JA. Development and evaluation of the  
404 Kansas City Cardiomyopathy Questionnaire: a new health status measure for heart  
405 failure. *J Am Coll Cardiol* 2000;35:1245-55.
- 406 22. Spertus J, Peterson E, Conard MW et al. Monitoring clinical changes in patients with  
407 heart failure: a comparison of methods. *Am Heart J* 2005;150:707-15.
- 408 23. Heidenreich PA, Spertus JA, Jones PG et al. Health status identifies heart failure  
409 outpatients at risk for hospitalization or death. *J Am Coll Cardiol* 2006;47:752-6.
- 410 24. Arnold SV, Spertus JA, Lei Y et al. Use of the Kansas City Cardiomyopathy  
411 Questionnaire for monitoring health status in patients with aortic stenosis. *Circ Heart Fail*  
412 2013;6:61-7.
- 413 25. Huff CM, Turer AT, Wang A. Correlations between physician-perceived functional status,  
414 patient-perceived health status, and cardiopulmonary exercise results in hypertrophic  
415 cardiomyopathy. *Qual Life Res* 2013;22:647-52.
- 416 26. Cella D, Riley W, Stone A et al. The Patient-Reported Outcomes Measurement  
417 Information System (PROMIS) developed and tested its first wave of adult self-reported  
418 health outcome item banks: 2005-2008. *J Clin Epidemiol* 2010;63:1179-94.
- 419 27. Revicki DA, Kawata AK, Harnam N, Chen WH, Hays RD, Cella D. Predicting EuroQol  
420 (EQ-5D) scores from the patient-reported outcomes measurement information system  
421 (PROMIS) global items and domain item banks in a United States sample. *Qual Life Res*  
422 2009;18:783-91.
- 423 28. Grodin JL, Hammadah M, Fan Y, Hazen SL, Tang WH. Prognostic value of estimating  
424 functional capacity with the use of the duke activity status index in stable patients with  
425 chronic heart failure. *J Card Fail* 2015;21:44-50.
- 426 29. Parissis JT, Nikolaou M, Birmpa D et al. Clinical and prognostic value of Duke's Activity  
427 Status Index along with plasma B-type natriuretic peptide levels in chronic heart failure  
428 secondary to ischemic or idiopathic dilated cardiomyopathy. *Am J Cardiol* 2009;103:73-  
429 5.
- 430 30. Tang WH, Topol EJ, Fan Y et al. Prognostic value of estimated functional capacity  
431 incremental to cardiac biomarkers in stable cardiac patients. *J Am Heart Assoc*  
432 2014;3:e000960.
- 433
- 434
